# Supplementary material for: Tocotrienol-Rich Vitamin E (Tocovid) Improved Nerve Conduction Velocity in Type 2 Diabetes Mellitus Patients in a Phase II Double-Blind, Randomized Controlled Clinical Trial
Source: MDPI journal article supplement (doi:10.3390/nu13113770), 2021-10-25
Supplement: s1 [file s1]

## Supplementary Materials

|                  |                                                                                                      |
|------------------|------------------------------------------------------------------------------------------------------|
| <b>Table S1</b>  | Glycemic control over 12 months by intervention group.                                               |
| <b>Table S2</b>  | Adverse events and serious adverse events reported by intervention group.                            |
| <b>Table S3</b>  | Within group comparison of median nerve conduction parameters from baseline.                         |
| <b>Table S4</b>  | Within group comparison of sural nerve conduction parameters from baseline.                          |
| <b>Table S5</b>  | Within group comparison of tibial nerve conduction parameters from baseline.                         |
| <b>Table S6</b>  | Compliance over 12 months by intervention group.                                                     |
| <b>Table S7</b>  | Plasma vitamin E levels over 12 months by intervention group.                                        |
| <b>Table S8</b>  | Lipid profile over six months by intervention group.                                                 |
| <b>Table S9</b>  | Between group comparison of changes in nerve conduction parameters in the low baseline CV subgroup.  |
| <b>Table S10</b> | Between group comparison of changes in nerve conduction parameters in the high baseline CV subgroup. |
| <b>Table S11</b> | Lipid profile after six months washout by intervention group.                                        |
| <b>Table S12</b> | Plasma vitamin E levels after six months washout by intervention group.                              |

**Table S1.** Glycemic control over 12 months by intervention group.

| HbA1c (%)         | Tocovid (n = 42)               |                                        | Placebo (n = 43)               |                                        | <i>p</i> -Value<br>(between<br>groups) ‡ |
|-------------------|--------------------------------|----------------------------------------|--------------------------------|----------------------------------------|------------------------------------------|
|                   | Mean ± SD /<br>Median<br>(IQR) | <i>p</i> -value<br>(within<br>group) † | Mean ± SD /<br>Median<br>(IQR) | <i>p</i> -value<br>(within<br>group) † |                                          |
| Baseline          | 7.53 ± 1.00 /<br>7.38 (1.50)   |                                        | 7.75 ± 1.16 /<br>7.75 (1.75)   |                                        | 0.363 ¶                                  |
| At 2 months       | 7.52 ± 1.12                    | 0.910                                  | 7.85 ± 1.28                    | 0.410                                  |                                          |
| At 6 months       | 7.25 ± 1.15                    | 0.111                                  | 7.66 ± 1.30                    | 0.569                                  |                                          |
| At 12 months      | 7.34 (1.2)                     | 0.500 §                                | 8 (1.91)                       | 0.200 §                                |                                          |
| 2 months changes  | 0 (0.78)                       |                                        | 0.15 (0.9)                     |                                        | 0.212                                    |
| 6 months changes  | -0.1 (1.49)                    |                                        | -0.05 (0.88)                   |                                        | 0.574                                    |
| 12 months changes | 0.08 (1.11)                    |                                        | 0.1 (1.35)                     |                                        | 0.192                                    |

† *p*-value obtained from paired t-test test by comparing the mean within each intervention group. ‡ *p*-value obtained from Mann-Whitney U test. § *p*-value obtained from Wilcoxon signed rank test by comparing the median within each intervention group. ¶ *p*-value obtained from independent t-test.

**Table S2.** Adverse events and serious adverse events reported by intervention group.

| Event                                          | Tocovid (n=43)         |           | Placebo (n=45)         |           |
|------------------------------------------------|------------------------|-----------|------------------------|-----------|
|                                                | Participants,<br>n (%) | Events    | Participants,<br>n (%) | Events    |
| Patients reporting more than one adverse event | 10 (23.3)              | -         | 9 (20)                 | -         |
| Patients reporting one adverse event           | 12 (27.9)              | -         | 14 (31.1)              | -         |
| Patients reporting a serious adverse event     | 4 (9.3)                | -         | 1 (2.2)                | -         |
| <b>Adverse events (AEs)</b>                    |                        |           |                        |           |
| Gastrointestinal disorders                     | 5 (11.6)               | 5         | 5 (11.1)               | 6         |
| Infections and infestations                    | 5 (11.6)               | 6         | 2 (4.4)                | 2         |
| Musculoskeletal disorders                      | 5 (11.6)               | 5         | 3 (6.7)                | 3         |
| Neurological disorders                         | 4 (9.3)                | 6         | 1 (2.2)                | 1         |
| Hypoglycemia                                   | 3 (7)                  | 4         | 2 (4.4)                | 2         |
| Lethargy and sleepiness                        | 2 (4.7)                | 2         | 3 (6.7)                | 4         |
| Dizziness                                      | 3 (7)                  | 3         | 2 (4.4)                | 2         |
| Dermatological disorders                       | 3 (7)                  | 3         | 2 (4.4)                | 2         |
| Eye disorders                                  | 2 (4.7)                | 2         | 3 (6.7)                | 3         |
| Psychiatric disorders                          | 1 (2.3)                | 2         | 2 (4.4)                | 2         |
| Respiratory disorders                          | 1 (2.3)                | 1         | 2 (4.4)                | 2         |
| Oedema                                         | 1 (2.3)                | 1         | 1 (2.2)                | 2         |
| Urinary disorders                              | 1 (2.3)                | 1         | 1 (2.2)                | 1         |
| Non traumatic injury                           | 0                      | 0         | 1 (2.2)                | 1         |
| Hematological disorders                        | 0                      | 0         | 1 (2.2)                | 1         |
| Total AEs (%)                                  |                        | 41 (54.7) |                        | 34 (45.3) |
| <b>Serious adverse events (SAEs)</b>           |                        |           |                        |           |
| Renal and urinary disorders                    | 1 (2.3)                | 1         | 1 (2.2)                | 1         |
| Mediastinal disorders                          | 1 (2.3)                | 1         | 0                      | 0         |
| Uterine disorders                              | 0                      | 0         | 1 (2.2)                | 1         |
| Viral fever                                    | 1 (2.3)                | 1         | 0                      | 0         |
| Total SAEs (%)                                 |                        | 3 (60)    |                        | 2 (40)    |

**Table S3.** Within group comparison of median nerve conduction parameters from baseline.

| Median Sensory Nerve      | Tocovid (n=68)               |                                           |                              | Placebo (n=65)                |                                           |                              |
|---------------------------|------------------------------|-------------------------------------------|------------------------------|-------------------------------|-------------------------------------------|------------------------------|
|                           | Mean $\pm$ SD / Median (IQR) | Difference from baseline<br>M/MD (95% CI) | <i>p</i> -Value <sup>†</sup> | Mean $\pm$ SD / Median (IQR)  | Difference from baseline<br>M/MD (95% CI) | <i>p</i> -Value <sup>†</sup> |
| NP Amplitude ( $\mu$ V)   |                              |                                           |                              |                               |                                           |                              |
| At baseline               | 19.5 (14.0)                  | -                                         | -                            | 17.5 (12.0)                   | -                                         | -                            |
| At 2 months               | 22.0 (16.4)                  | 1.40 (0.05, 2.75)                         | 0.040 *                      | 17.3 (11.9)                   | 0.82 (-0.35, 2.00)                        | 0.155                        |
| At 6 months               | 22.5 (16.4)                  | 1.20 (0.05, 2.60)                         | 0.036 *                      | 17.0 (12.3)                   | 0.85 (-0.35, 2.20)                        | 0.149                        |
| At 12 months              | 20.8 (15.5)                  | 0.25 (-0.95, 1.54)                        | 0.680                        | 17.1 (15.2)                   | 0.37 (-1.15, 1.85)                        | 0.630                        |
| PP Amplitude ( $\mu$ V)   |                              |                                           |                              |                               |                                           |                              |
| At baseline               | 31.9 (22.7)                  | -                                         | -                            | 27.3 (14.7)                   | -                                         | -                            |
| At 2 months               | 33.8 (22.0)                  | 2.90 (0.60, 5.35)                         | 0.013 *                      | 28.8 (19.9)                   | 0.80 (-0.85, 2.45)                        | 0.308                        |
| At 6 months               | 38.8 (20.8)                  | 3.25 (0.60, 6.45)                         | 0.016 *                      | 29.3 (17.8)                   | 1.05 (-0.85, 2.80)                        | 0.247                        |
| At 12 months              | 36.7 (20.8)                  | 3.35 (-0.05, 5.95)                        | 0.051                        | 28.6 (18.3)                   | 1.20 (-1.75, 3.75)                        | 0.401                        |
| Conduction Velocity (m/s) |                              |                                           |                              |                               |                                           |                              |
| At baseline               | 44.0 $\pm$ 6.79 / 42.8 (9.4) | -                                         | -                            | 43.2 $\pm$ 7.10 / 43.8 (9.10) | -                                         | -                            |
| At 2 months               | 44.8 (11.9)                  | 2.00 (1.40, 2.60)                         | <0.001***                    | 42.7 $\pm$ 6.36               | -0.42 (-1.06, 0.23)                       | 0.204 †                      |
| At 6 months               | 43.9 $\pm$ 7.39              | -0.17 (-1.55, 1.22)                       | 0.810 †                      | 42.6 $\pm$ 6.20               | -0.52 (-1.11, 0.08)                       | 0.090 †                      |
| At 12 months              | 46.4 (9.17)                  | 2.08 (1.26, 2.90)                         | <0.001 ***                   | 44.9 (6.10)                   | 0.70 (-0.30, 1.70)                        | 0.153                        |
| Peak Velocity (m/s)       |                              |                                           |                              |                               |                                           |                              |
| At baseline               | 35.2 $\pm$ 4.80 / 34.1 (6.0) | -                                         | -                            | 34.7 $\pm$ 5.06               | -                                         | -                            |
| At 2 months               | 35.2 (7.95)                  | 1.05 (0.60, 1.60)                         | <0.001 ***                   | 36.2 $\pm$ 4.81               | -0.34 (-0.82, 0.13)                       | 0.152 †                      |
| At 6 months               | 35.9 $\pm$ 4.58              | 0.71 (0.19, 1.24)                         | 0.009 **                     | 34.3 $\pm$ 4.45               | -0.44 (-1.09, 0.20)                       | 0.177 †                      |
| At 12 months              | 34.1 (7.46)                  | 0.45 (-0.35, 1.10)                        | 0.296                        | 34.8 $\pm$ 4.26               | 0.07 (-0.64, 0.78)                        | 0.851 †                      |

\*  $p < 0.05$ , \*\*  $p < 0.01$ , \*\*\*  $p < 0.001$ †  $p$ -value obtained from Wilcoxon signed rank test by comparing the median within each intervention group. ‡  $p$ -value obtained from paired t-test test by comparing the mean within each intervention group.

Abbreviations: M: Mean; NP: Negative peak; PP: Peak to peak.

**Table S4.** Within group comparison of sural nerve conduction parameters from baseline.

| Sural Sensory Nerve       | Tocovid (n=55)                  |                                           |                              | Placebo (n=45)                  |                                           |                              |
|---------------------------|---------------------------------|-------------------------------------------|------------------------------|---------------------------------|-------------------------------------------|------------------------------|
|                           | Mean $\pm$ SD /<br>Median (IQR) | Difference from baseline<br>M/MD (95% CI) | <i>p</i> -Value <sup>†</sup> | Mean $\pm$ SD /<br>Median (IQR) | Difference from baseline<br>M/MD (95% CI) | <i>p</i> -Value <sup>†</sup> |
| NP Amplitude ( $\mu$ V)   |                                 |                                           |                              |                                 |                                           |                              |
| At baseline               | 9.7 (8.00)                      | -                                         | -                            | 10.1 (4.9)                      | -                                         | -                            |
| At 2 months               | 8.5 (7.75)                      | 0.20 (-0.75, 1.15)                        | 0.611                        | 8.5 (5.3)                       | -0.30 (-1.10, 0.30)                       | 0.304                        |
| At 6 months               | 9.3 (6.4)                       | 0.55 (-0.55, 1.45)                        | 0.260                        | 7.8 (6.1)                       | -0.85 (-1.80, 0.25)                       | 0.153                        |
| At 12 months              | 10.7 (4.35)                     | -0.35 (-1.75, 1.23)                       | 0.709                        | 8.8 (5.58)                      | -0.60 (-1.65, 0.65)                       | 0.326                        |
| PP Amplitude ( $\mu$ V)   |                                 |                                           |                              |                                 |                                           |                              |
| At baseline               | 6.6 (8.3)                       | -                                         | -                            | 8.7 (7.8)                       | -                                         | -                            |
| At 2 months               | 6.5 (9.0)                       | 1.00 (0.35, 1.70)                         | 0.003 **                     | 7.4 (8.2)                       | 0.40 (-0.51, 1.30)                        | 0.378                        |
| At 6 months               | 7.8 (10.8)                      | 2.25 (1.15, 3.65)                         | <0.001 ***                   | 9.4 (6.7)                       | 0.60 (-0.60, 2.00)                        | 0.310                        |
| At 12 months              | 8.32 (6.85)                     | 2.10 (0.75, 3.40)                         | 0.004 **                     | 8.2 (8.2)                       | 1.17 (-0.30, 2.40)                        | 0.111                        |
| Conduction Velocity (m/s) |                                 |                                           |                              |                                 |                                           |                              |
| At baseline               | 43.8 (7.75)                     | -                                         | -                            | 43.0 $\pm$ 4.98                 | -                                         | -                            |
| At 2 months               | 44.4 (7.80)                     | 1.75 (1.40, 2.20)                         | <0.001 ***                   | 42.3 $\pm$ 4.51                 | -0.69 (-1.22, -0.16)                      | 0.012 * <sup>‡</sup>         |
| At 6 months               | 44.4 (8.65)                     | 1.60 (1.10, 2.30)                         | <0.001 ***                   | 42.2 $\pm$ 4.68                 | -0.74 (-1.23, -0.24)                      | 0.005 ** <sup>‡</sup>        |
| At 12 months              | 44.4 (8.25)                     | 1.75 (0.95, 2.39)                         | <0.001 ***                   | 43.5 $\pm$ 4.43                 | 0.51 (-0.35, 1.38)                        | 0.236 <sup>‡</sup>           |
| Peak Velocity (m/s)       |                                 |                                           |                              |                                 |                                           |                              |
| At baseline               | 34.1 (7.05)                     | -                                         | -                            | 34.4 $\pm$ 3.7 / 33.7 (5.1)     | -                                         | -                            |
| At 2 months               | 34.6 (7.15)                     | 1.15 (0.80, 1.60)                         | <0.001 ***                   | 33.3 (3.20)                     | -0.65 (-1.15, -0.05)                      | 0.041 *                      |
| At 6 months               | 35.0 (6.05)                     | 1.40 (0.85, 1.95)                         | <0.001 ***                   | 34.3 $\pm$ 3.6                  | -0.04 (-0.55, 0.46)                       | 0.860 <sup>‡</sup>           |
| At 12 months              | 38.4 (7.50)                     | 3.00 (2.10, 4.54)                         | <0.001 ***                   | 35.3 $\pm$ 3.93                 | 0.89 (0.12, 1.66)                         | 0.024 * <sup>‡</sup>         |

\*  $p < 0.05$ , \*\*  $p < 0.01$ , \*\*\*  $p < 0.001$ <sup>†</sup>  $p$ -value obtained from Wilcoxon signed rank test by comparing the median within each intervention group. <sup>‡</sup>  $p$ -value obtained from paired t-test test by comparing the mean within each intervention group.

Abbreviations: M: Mean; NP: Negative peak; PP: Peak to peak.

**Table S5.** Within group comparison of tibial nerve conduction parameters from baseline.

| Tibial Motor Nerve              | Tocovid (n=76)              |                                           |                   | Placebo (n=73)              |                                           |                   |
|---------------------------------|-----------------------------|-------------------------------------------|-------------------|-----------------------------|-------------------------------------------|-------------------|
|                                 | Mean ± SD /<br>Median (IQR) | Difference from baseline<br>M/MD (95% CI) | <i>p</i> -Value † | Mean ± SD /<br>Median (IQR) | Difference from baseline<br>M/MD (95% CI) | <i>p</i> -Value † |
| Conduction Velocity (m/s)       |                             |                                           |                   |                             |                                           |                   |
| At baseline                     | 41.5 ± 5.54                 | -                                         | -                 | 39.9 ± 6.15 / 40.5 (10.5)   | -                                         | -                 |
| At 2 months                     | 42.4 ± 4.83                 | 0.88 (0.31, 1.45)                         | 0.003 **†         | 38.7 ± 5.82                 | -1.15 (-1.86, -0.45)                      | 0.002 **†         |
| At 6 months                     | 42.4 ± 5.10                 | 0.93 (0.19, 1.67)                         | 0.014 *†          | 39.5 ± 5.29                 | -0.37 (-1.36, 0.62)                       | 0.463 †           |
| At 12 months                    | 41.8 ± 5.38                 | 0.27 (-0.64, 1.18)                        | 0.555 †           | 39.6 (8.3)                  | -1.25 (-2.20, -0.20)                      | 0.023 *           |
| Distal Amplitude at Ankle (mV)  |                             |                                           |                   |                             |                                           |                   |
| At baseline                     | 7.25 (5.75)                 | -                                         | -                 | 7.6 (7.2)                   | -                                         | -                 |
| At 2 months                     | 8.8 (5.98)                  | 1.05 (0.70, 1.45)                         | <0.001 ***        | 8.9 (6.3)                   | 0.75 (0.45, 1.15)                         | <0.001 ***        |
| At 6 months                     | 8.23 (5.83)                 | 0.60 (0.05, 1.20)                         | 0.041 *           | 8.7 (6.1)                   | 0.75 (0.40, 1.15)                         | <0.001 ***        |
| At 12 months                    | 9.56 (4.40)                 | 1.37 (0.73, 2.00)                         | <0.001 ***        | 9.3 (6.6)                   | 0.65 (0.25, 1.10)                         | 0.001 **          |
| Proximal Amplitude at Knee (mV) |                             |                                           |                   |                             |                                           |                   |
| At baseline                     | 5.20 (3.98)                 | -                                         | -                 | 5.5 (5.90)                  | -                                         | -                 |
| At 2 months                     | 6.2 (4.35)                  | 0.70 (0.45, 1.00)                         | <0.001 ***        | 5.8 (5.6)                   | 0.65 (0.35, 0.90)                         | <0.001 ***        |
| At 6 months                     | 6.15 (4.5)                  | 0.50 (0.25, 0.85)                         | <0.001 ***        | 6.3 (5.6)                   | 0.65 (0.35, 1.00)                         | <0.001 ***        |
| At 12 months                    | 6 (4.26)                    | 0.55 (0.13, 0.95)                         | 0.013 *           | 5.5 (5.2)                   | 0.35 (-1.78×10 <sup>-5</sup> , 0.70)      | 0.056             |

\*  $p < 0.05$ , \*\*  $p < 0.01$ , \*\*\*  $p < 0.001$ †  $p$ -value obtained from Wilcoxon signed rank test by comparing the median within each intervention group. ‡  $p$ -value obtained from paired t-test test by comparing the mean within each intervention group.

**Table S6.** Compliance over 12 months by intervention group.

| <b>Compliance</b>    | <b>Tocovid (n = 42)</b> | <b>Placebo (n = 43)</b> | <b><i>p</i>-Value<sup>†</sup></b> |
|----------------------|-------------------------|-------------------------|-----------------------------------|
| Baseline to 2 months | 97.9 (5.69)             | 98.2 (8.94)             | 0.895                             |
| 2 to 6 months        | 97.8 (9.36)             | 97 (7.49)               | 0.801                             |
| 6 to 12 months       | 97 (5.9)                | 97 (4.33)               | 0.912                             |
| Over 12 months       | 96.6 (6.84)             | 96.1 (6.90)             | 0.626                             |

Data presented as median (interquartile range).

<sup>†</sup> *p*-Value obtained from Mann-Whitney test.

**Table S7.** Plasma vitamin E levels over 12 months by intervention group.

| Plasma vitamin E levels | Tocovid (n = 42) |                                  | Placebo (n = 43) |                                  | <i>p</i> -Value (between groups) ‡ |
|-------------------------|------------------|----------------------------------|------------------|----------------------------------|------------------------------------|
|                         |                  | <i>p</i> -Value (within group) † |                  | <i>p</i> -Value (within group) † |                                    |
| α-Tocotrienol (pg/mL)   |                  |                                  |                  |                                  |                                    |
| At baseline             | 37.3 (55.1)      |                                  | 37.5 (48.8)      |                                  | 0.629                              |
| At 2 months             | 67.6 (109)       | 0.007 **                         | 20.9 (44.6)      | 0.329                            |                                    |
| At 6 months             | 59.5 (238)       | 0.039 *                          | 18.0 (54.4)      | 0.611                            |                                    |
| At 12 months            | 50.9 (35.7)      | 0.701                            | 22.5 (21.1)      | <0.001 ***                       |                                    |
| 2 months changes        | 29.2 (99.7)      |                                  | -8.01 (26.5)     |                                  | 0.005 **                           |
| 6 months changes        | 16.5 (152)       |                                  | -13.3 (72.5)     |                                  | 0.051                              |
| 12 months changes       | 10.4 (77.2)      |                                  | -13.4 (26.3)     |                                  | 0.012 *                            |
| γ-Tocotrienol (pg/mL)   |                  |                                  |                  |                                  |                                    |
| At baseline             | 22.3 (31.0)      |                                  | 24.7 (28.5)      |                                  | 0.913                              |
| At 2 months             | 74.7 (142)       | 0.003 **                         | 7.46 (16.9)      | <0.001 ***                       |                                    |
| At 6 months             | 31.28 (133)      | 0.007 **                         | 11.6 (21.0)      | 0.002 **                         |                                    |
| At 12 months            | 30.0 (28.7)      | 0.472                            | 13.2 (17.9)      | 0.004 **                         |                                    |
| 2 months changes        | 38.7 (114)       |                                  | -10.4 (22.0)     |                                  | <0.001 ***                         |
| 6 months changes        | 12.1 (114)       |                                  | -10.1 (22.0)     |                                  | <0.001 ***                         |
| 12 months changes       | 5.82 (34.8)      |                                  | -13.5 (35.6)     |                                  | 0.013 *                            |
| δ-Tocotrienol (pg/mL)   |                  |                                  |                  |                                  |                                    |
| At baseline             | 12.7 (16.2)      |                                  | 12.7 (13.6)      |                                  | 0.776                              |
| At 2 months             | 32.2 (71.7)      | <0.001 ***                       | 4.4 (11.2)       | 0.037 *                          |                                    |
| At 6 months             | 13.7 (50.5)      | 0.072                            | 7.41 (9.79)      | 0.033 *                          |                                    |
| At 12 months            | 12.7 (7.68)      | 0.446                            | 5.39 (5.77)      | <0.001 ***                       |                                    |
| 2 months changes        | 12.4 (50.1)      |                                  | -4.92 (10.6)     |                                  | <0.001 ***                         |
| 6 months changes        | 5.09 (44.6)      |                                  | -3.41 (9.75)     |                                  | 0.011 *                            |
| 12 months changes       | 0.87 (17.6)      |                                  | -6.45 (12.4)     |                                  | 0.014 *                            |
| α-Tocopherol (ng/mL)    |                  |                                  |                  |                                  |                                    |
| At baseline             | 1.64 (1.22)      |                                  | 1.92 (1.57)      |                                  | 0.861                              |
| At 2 months             | 1.60 (2.97)      | 0.339                            | 1.07 (1.02)      | 0.033 *                          |                                    |
| At 6 months             | 1.27 (5.45)      | 0.457                            | 0.80 (0.76)      | 0.034 *                          |                                    |
| At 12 months            | 1.28 (0.30)      | 0.003 **                         | 0.97 (0.46)      | <0.001 ***                       |                                    |
| 2 months changes        | -0.02 (1.60)     |                                  | -0.48 (1.12)     |                                  | 0.005 **                           |
| 6 months changes        | -0.06 (2.23)     |                                  | -0.69 (1.14)     |                                  | 0.006 **                           |
| 12 months changes       | -0.29 (1.47)     |                                  | -0.87 (1.10)     |                                  | 0.100                              |

\*  $p < 0.05$ , \*\*  $p < 0.01$ , \*\*\*  $p < 0.001$ 

Data presented as median (interquartile range).

†  $p$ -value obtained from Wilcoxon signed rank test by comparing the median within each intervention group. ‡ $p$ -value obtained from Mann-Whitney U test by comparing the median between Tocovid and placebo groups.



Table S8. Lipid profile over six months by intervention group.

| Lipid profile    | Tocovid (n = 42)          |                                        | Placebo (n = 43)          |                                        | <i>p</i> -Value<br>(between<br>groups) ‡ |
|------------------|---------------------------|----------------------------------------|---------------------------|----------------------------------------|------------------------------------------|
|                  |                           | <i>p</i> -Value<br>(within<br>group) † |                           | <i>p</i> -Value<br>(within<br>group) † |                                          |
| TC (mmol/L)      |                           |                                        |                           |                                        |                                          |
| At baseline      | 4.88 ± 1.08 / 4.80 (1.36) |                                        | 4.46 ± 1.00 / 4.22 (1.25) |                                        | 0.067 ¶                                  |
| At 2 months      | 4.93 ± 0.99               | 0.607 §                                | 4.17 (1.47)               | 0.305                                  |                                          |
| At 6 months      | 4.57 (1.30)               | 0.196                                  | 4.2 (0.8)                 | 0.190                                  |                                          |
| 2 months changes | -0.11 (0.91)              |                                        | -0.10 (0.79)              |                                        | 0.601                                    |
| 6 months changes | -0.26 (0.96)              |                                        | -0.03 (0.67)              |                                        | 0.758                                    |
| TG (mmol/L)      |                           |                                        |                           |                                        |                                          |
| At baseline      | 1.47 (0.92)               |                                        | 1.53 (1.05)               |                                        | 0.610                                    |
| At 2 months      | 1.60 (1.01)               | 0.368                                  | 1.63 (0.89)               | 0.740                                  |                                          |
| At 6 months      | 1.49 (0.95)               | 0.565                                  | 1.44 (0.85)               | 0.145                                  |                                          |
| 2 months changes | 0.04 (0.94)               |                                        | -0.09 (0.74)              |                                        | 0.298                                    |
| 6 months changes | 0.06 (0.89)               |                                        | -0.03 (0.62)              |                                        | 0.210                                    |
| HDL-C (mmol/L)   |                           |                                        |                           |                                        |                                          |
| At baseline      | 1.3 (0.4) / 1.32 ± 0.27   |                                        | 1.20 (0.44)               |                                        | 0.266                                    |
| At 2 months      | 1.30 (0.48)               | 0.485                                  | 1.3 (0.4)                 | 0.357                                  |                                          |
| At 6 months      | 1.42 ± 0.33               | 0.004 **§                              | 1.30 (0.35)               | <0.001 ***                             |                                          |
| 2 months changes | 0.03 ± 0.24               |                                        | 0.02 ± 0.22               |                                        | 0.891 ¶                                  |
| 6 months changes | 0.1 (0.2)                 |                                        | 0.1 (0.2)                 |                                        | 0.814                                    |
| LDL-C (mmol/L)   |                           |                                        |                           |                                        |                                          |
| At baseline      | 2.60 (1.55) / 2.77 ± 1.03 |                                        | 2.30 (1.15)               |                                        | 0.099                                    |
| At 2 months      | 2.80 ± 0.91               | 0.749 §                                | 2.30 (1.15)               | 0.250                                  |                                          |
| At 6 months      | 2.37 (0.98)               | 0.017 *                                | 2.0 (0.7)                 | 0.009 **                               |                                          |
| 2 months changes | 0.10 (0.78)               |                                        | -0.10 (0.65)              |                                        | 0.240                                    |
| 6 months changes | -0.30 (0.88)              |                                        | -0.10 (0.63)              |                                        | 0.823                                    |

\*  $p < 0.05$ , \*\*  $p < 0.01$ , \*\*\*  $p < 0.001$ 

Data presented as median (interquartile range) or mean ± standard deviation.

† *p*-value obtained from Wilcoxon signed rank test by comparing the median within each intervention group. ‡*p*-value obtained from Mann-Whitney U test by comparing the median between Tocovid and placebo groups. §*p*-value obtained from paired t-test by comparing mean within each intervention group. ¶ *p*-value obtained from independent t-test by comparing the mean between Tocovid and placebo groups.

Abbreviations: TC: total cholesterol; TG: triglycerides; HDL-C: high-density lipoprotein cholesterol; LDL-C: low-density lipoprotein cholesterol.

**Table S9.** Between group comparison of changes in nerve conduction parameters in the low baseline CV subgroup.

| Baseline characteristics           | Tocovid<br>(n) | Placebo<br>(n) | 2 months changes |              |                              | 6 months changes |              |                              | 12 months changes |              |                              |
|------------------------------------|----------------|----------------|------------------|--------------|------------------------------|------------------|--------------|------------------------------|-------------------|--------------|------------------------------|
|                                    |                |                | Tocovid          | Placebo      | <i>p</i> -Value <sup>†</sup> | Tocovid          | Placebo      | <i>p</i> -Value <sup>†</sup> | Tocovid           | Placebo      | <i>p</i> -Value <sup>†</sup> |
| Median CV < 43.61 m/s <sup>a</sup> |                |                |                  |              |                              |                  |              |                              |                   |              |                              |
| (N=68)                             | 36             | 32             |                  |              |                              |                  |              |                              |                   |              |                              |
| NPA                                |                |                | 0.85 (4.60)      | -0.05 (4.08) | 0.258                        | 0.30 (3.80)      | 0.60 (4.58)  | 0.619                        | 0.98 (5.06)       | 0.90 (6.01)  | 0.949                        |
| PPA                                |                |                | 1.1 (8.6)        | 0.10 (6.25)  | 0.326                        | 3.95 (13.55)     | 0.90 (7.35)  | 0.206                        | 3.1 (17.1)        | 4.9 (9.8)    | 0.956                        |
| CV                                 |                |                | 1.60 (2.25)      | 0.20 (2.88)  | 0.008 **                     | 1.75 (2.13)      | 0.20 (3.25)  | 0.096                        | 2.95 (4.42)       | 2.55 (3.03)  | 0.370                        |
| PV                                 |                |                | 1.07 ± 1.47      | 0.32 ± 1.84  | 0.067 <sup>‡</sup>           | 0.95 (2.20)      | 0 (2.93)     | 0.037 *                      | 0.67 ± 2.24       | 1.37 ± 2.23  | 0.203 <sup>‡</sup>           |
| Sural CV < 43.16 m/s <sup>a</sup>  |                |                |                  |              |                              |                  |              |                              |                   |              |                              |
| (N=51)                             | 26             | 25             |                  |              |                              |                  |              |                              |                   |              |                              |
| NPA                                |                |                | 0.45 ± 2.02      | -0.62 ± 2.66 | 0.111 <sup>‡</sup>           | 0.36 ± 2.90      | -1.58 ± 3.13 | 0.026 ** <sup>‡</sup>        | 1.82 ± 3.55       | -0.99 ± 3.83 | 0.009 ** <sup>‡</sup>        |
| PPA                                |                |                | 0.79 ± 2.12      | 0.19 ± 2.65  | 0.380 <sup>‡</sup>           | 1.70 (4.85)      | -0.5 (4.5)   | 0.070                        | 3.74 (5.12)       | 1.0 (5.5)    | 0.014 *                      |
| CV                                 |                |                | 1.85 (1.28)      | 0.0 (1.3)    | <0.001 ***                   | 1.7 (2.3)        | 0 (0.7)      | <0.001 ***                   | 2.95 ± 3.23       | 1.59 ± 2.55  | 0.102 <sup>‡</sup>           |
| PV                                 |                |                | 1.35 (1.48)      | 0.0 (1.5)    | <0.001 ***                   | 2.29 ± 1.79      | 0.43 ± 1.73  | <0.001 *** <sup>‡</sup>      | 3.20 (6.84)       | 0.4 (3.4)    | <0.001 ***                   |
| Tibial CV < 40.71 m/s <sup>a</sup> |                |                |                  |              |                              |                  |              |                              |                   |              |                              |
| (N=78)                             | 38             | 40             |                  |              |                              |                  |              |                              |                   |              |                              |
| CV                                 |                |                | 1.05(2.50)       | -0.3 (1.9)   | <0.001 ***                   | 0.85 (3.20)      | 0 (1.83)     | 0.015 *                      | 1.78 ± 4.27       | 0.39 ± 4.21  | 0.152 <sup>‡</sup>           |
| AA                                 |                |                | 0.80 (1.88)      | 0.40 (1.25)  | 0.276                        | 0.00 (2.75)      | 0.55 (1.48)  | 0.291                        | 1.95 (3.18)       | 0.25 (1.37)  | 0.016 *                      |
| KA                                 |                |                | 0.55 (1.20)      | 0.50 (1.43)  | 0.869                        | 0.55 (1.88)      | 0.70 (1.55)  | 0.453                        | 0.40 (1.71)       | 0.15 (1.43)  | 0.217                        |

\*  $p < 0.05$ , \*\*  $p < 0.01$ , \*\*\*  $p < 0.001$

Data presented as median (interquartile range) or mean ± standard deviation.

<sup>a</sup> Mean CV; <sup>†</sup>  $p$ -value obtained from Mann-Whitney U test by comparing the median between Tocovid and placebo groups. <sup>‡</sup>  $p$ -value obtained from independent t-test by comparing the mean between Tocovid and placebo groups.

Abbreviations: n: Number of participants in each intervention group; N: Number of participants in each subgroup for each nerve.

**Table S10.** Between group comparison of changes in nerve conduction parameters in the high baseline CV subgroup.

| Baseline characteristics           | Tocovid<br>(n) | Placebo<br>(n) | 2 months changes |              |                 | 6 months changes |              |                 | 12 months changes |              |                 |
|------------------------------------|----------------|----------------|------------------|--------------|-----------------|------------------|--------------|-----------------|-------------------|--------------|-----------------|
|                                    |                |                | Tocovid          | Placebo      | <i>p</i> -Value | Tocovid          | Placebo      | <i>p</i> -Value | Tocovid           | Placebo      | <i>p</i> -Value |
| Median CV ≥ 43.61 m/s <sup>a</sup> |                |                |                  |              |                 |                  |              |                 |                   |              |                 |
| (N=65)                             | 32             | 33             |                  |              |                 |                  |              |                 |                   |              |                 |
| NPA                                |                |                | 1.28 ± 7.34      | 1.81 ± 4.91  | 0.737           | 1.30 (7.15)      | 0.5 (6.7)    | 0.694           | -0.35 (5.78)      | 0.9 (8.7)    | 0.808           |
| PPA                                |                |                | 3.46 ± 10.4      | 1.31 ± 8.02  | 0.353           | 1.85 (13.85)     | 0.6 (7.0)    | 0.632           | 4.05 (10.75)      | 1.1 (12.8)   | 0.194           |
| CV                                 |                |                | 0.95 (3.00)      | -0.7 (3.10)  | <0.001 ***      | 0.35 (2.95)      | -1.2 (2.3)   | 0.008 **        | 0.9 (3.30)        | -0.8 (2.3)   | 0.005 **        |
| PV                                 |                |                | 0.80 (2.95)      | -0.5 (1.4)   | <0.001 ***      | 0.26 ± 2.30      | -1.22 ± 1.67 | 0.004 **        | 0.55 (4.20)       | -0.5 (2.3)   | 0.203           |
| Sural CV ≥ 43.16 m/s <sup>a</sup>  |                |                |                  |              |                 |                  |              |                 |                   |              |                 |
| (N=49)                             | 29             | 20             |                  |              |                 |                  |              |                 |                   |              |                 |
| NPA                                |                |                | 0.1 (5.7)        | -0.25 (1.95) | 0.684           | 0.3 (4.8)        | 0.00 (5.65)  | 0.927           | -3.12 ± 6.09      | 0.18 ± 4.83  | 0.049 *         |
| PPA                                |                |                | 1.40 ± 2.76      | 0.73 ± 3.41  | 0.453           | 2.40 ± 4.07      | 1.59 ± 4.84  | 0.533           | 0.70 (4.06)       | 2.20 (2.79)  | 0.422           |
| CV                                 |                |                | 1.23 ± 1.70      | -1.80 ± 1.47 | <0.001 ***      | 0.91 ± 2.13      | -1.50 ± 1.53 | <0.001 ***      | 1.0 (3.3)         | -0.65 (2.63) | 0.065           |
| PV                                 |                |                | 0.79 ± 1.59      | -1.36 ± 1.56 | <0.001 ***      | 0.53 ± 1.76      | -0.64 ± 1.44 | 0.019 *         | 2.12 ± 2.70       | 0.30 ± 2.64  | 0.023 *         |
| Tibial CV ≥ 40.71 m/s <sup>a</sup> |                |                |                  |              |                 |                  |              |                 |                   |              |                 |
| (N=71)                             | 38             | 33             |                  |              |                 |                  |              |                 |                   |              |                 |
| CV                                 |                |                | 0.40 (1.45)      | -2.5 (3.0)   | <0.001 ***      | -0.35 ± 2.31     | -2.21 ± 2.62 | 0.002 **        | -2.00 (3.18)      | -3.30 (4.18) | 0.032 *         |
| AA                                 |                |                | 0.80 (1.78)      | 0.9 (2.0)    | 0.716           | 0.85 (2.35)      | 0.9 (2.2)    | 0.608           | 0.98 ± 2.34       | 1.46 ± 2.68  | 0.426           |
| KA                                 |                |                | 0.65 (1.33)      | 0.5 (1.4)    | 0.645           | 0.40 (1.45)      | 0.1 (1.4)    | 0.482           | 0.23 (2.48)       | 0.3 (2.1)    | 0.769           |

\*  $p < 0.05$ , \*\*  $p < 0.01$ , \*\*\*  $p < 0.001$

Data presented as median (interquartile range) or mean  $\pm$  standard deviation.

<sup>a</sup> Mean CV; <sup>†</sup>  $p$ -value obtained from Mann-Whitney U test by comparing the median between Tocovid and placebo groups. <sup>\*</sup>  $p$ -value obtained from independent t-test by comparing the mean between Tocovid and placebo groups.

Abbreviations: n: Number of participants in each intervention group; N: Number of participants in each subgroup for each nerve.

Table S11. Lipid profile after six months washout by intervention group.

| Lipid profile         | Tocovid (n = 33)          |                                        | Placebo (n = 39) |                                        | <i>p</i> -Value<br>(between<br>groups) ‡ |
|-----------------------|---------------------------|----------------------------------------|------------------|----------------------------------------|------------------------------------------|
|                       |                           | <i>p</i> -Value<br>(within<br>group) † |                  | <i>p</i> -Value<br>(within<br>group) † |                                          |
| <b>TC (mmol/L)</b>    |                           |                                        |                  |                                        |                                          |
| At baseline (B)       | 4.51 (1.19) / 4.66 ± 0.97 |                                        | 4.27 (1.25)      |                                        | 0.296                                    |
| At washout (WO)       | 4.58 (1.14) / 4.63 ± 0.97 | 0.816 §                                | 4.33 (1.29)      | 0.629                                  | 0.351                                    |
| WO - B                | 0.03 ± 0.79               |                                        | -0.02 ± 0.76     |                                        | 0.795 ¶                                  |
| <b>TG (mmol/L)</b>    |                           |                                        |                  |                                        |                                          |
| At baseline (B)       | 1.27 (0.87)               |                                        | 1.53 (1.08)      |                                        | 0.224                                    |
| At washout (WO)       | 1.37 (0.85)               | 0.710                                  | 1.37 (1.11)      | 0.214                                  | 0.505                                    |
| WO - B                | 0 (0.68)                  |                                        | -0.05 (0.63)     |                                        | 0.261                                    |
| <b>HDL-C (mmol/L)</b> |                           |                                        |                  |                                        |                                          |
| At baseline (B)       | 1.4 (0.4) / 1.40 ± 0.34   |                                        | 1.2 (0.34)       |                                        | 0.079                                    |
| At washout (WO)       | 1.30 (0.36) / 1.36 ± 0.26 | 0.347 §                                | 1.27 (0.26)      | <b>0.021 *</b>                         | 0.626                                    |
| WO - B                | 0 (0.33)                  |                                        | 0.06 (0.25)      |                                        | 0.288                                    |
| <b>LDL-C (mmol/L)</b> |                           |                                        |                  |                                        |                                          |
| At baseline (B)       | 2.5 (1.1) / 2.54 ± 0.84   |                                        | 2.30 (1.15)      |                                        | 0.309                                    |
| At washout (WO)       | 2.46 (1.07) / 2.60 ± 0.89 | 0.586 §                                | 2.11 (1.05)      | 0.194                                  | 0.175                                    |
| WO - B                | -0.06 ± 0.64              |                                        | -0.15 ± 0.83     |                                        | 0.614 ¶                                  |

\*  $p < 0.05$ , \*\*  $p < 0.01$ , \*\*\*  $p < 0.001$

Data presented as median (interquartile range) or mean ± standard deviation.

† *p*-value obtained from Wilcoxon signed rank test by comparing the median within each intervention group. ‡

*p*-value obtained from Mann-Whitney U test by comparing the median between Tocovid and placebo groups. §

*p*-value obtained from paired t-test by comparing mean within each intervention group. ¶ *p*-value obtained from independent t-test by comparing the mean between Tocovid and placebo groups.

Abbreviations: TC: total cholesterol; TG: triglycerides; HDL-C: high-density lipoprotein cholesterol; LDL-C: low-density lipoprotein cholesterol.

**Table S12.** Plasma vitamin E levels after six months washout by intervention group.

| Plasma vitamin E levels      | Tocovid (n = 33)          |                                  | Placebo (n = 39)          |                                  | <i>p</i> -Value (between groups) ‡ |
|------------------------------|---------------------------|----------------------------------|---------------------------|----------------------------------|------------------------------------|
|                              |                           | <i>p</i> -value (within group) † |                           | <i>p</i> -value (within group) † |                                    |
| <b>α-Tocotrienol (pg/mL)</b> |                           |                                  |                           |                                  |                                    |
| At baseline (B)              | 35.5 (30.9)               |                                  | 37.5 (48.8)               |                                  | 0.756                              |
| At 12 months (12M)           | 49.4 (27.4)               | 0.183                            | 22.5 (19.9)               | 0.002 *                          |                                    |
| At washout (WO)              | 12.5 (13.9)               | 0.012 *                          | 9.56 (17.5)               | <0.001 ***                       | 0.148                              |
| WO – B                       | -11.7 (46.1)              |                                  | -23.4 (40.2)              |                                  | 0.339                              |
| WO – 12M                     | -29.6 (33.7)              |                                  | -8.17 (16.8)              |                                  | 0.002 **                           |
| <b>γ-Tocotrienol (pg/mL)</b> |                           |                                  |                           |                                  |                                    |
| At baseline (B)              | 18.1 (13.3)               |                                  | 24.1 (29.4)               |                                  | 0.493                              |
| At 12 months (12M)           | 23.6 (24.1)               | 0.171                            | 13.4 (17.7)               | 0.011 *                          |                                    |
| At washout (WO)              | 5.76 (7.07)               | <0.001 ***                       | 4.03 (8.50)               | <0.001 ***                       | 0.044 *                            |
| WO – B                       | -12.1 (20.7)              |                                  | -20.7 (32.6)              |                                  | 0.362                              |
| WO – 12M                     | -13.6 (29.9)              |                                  | -7.68 (14.4)              |                                  | 0.049 *                            |
| <b>δ-Tocotrienol (pg/mL)</b> |                           |                                  |                           |                                  |                                    |
| At baseline (B)              | 11.3 (9.76)               |                                  | 12.7 (12.6)               |                                  | 0.551                              |
| At 12 months (12M)           | 12.4 (10.3)               | 0.708                            | 5.52 (5.77)               | <0.001 ***                       |                                    |
| At washout (WO)              | 3.15 (2.35)               | <0.001 ***                       | 2.73 (1.45)               | <0.001 ***                       | 0.047 *                            |
| WO – B                       | -8.25 (11.2)              |                                  | -8.89 (12.5)              |                                  | 0.334                              |
| WO – 12M                     | -9.52 ± 7.43              |                                  | -3.29 ± 5.01              |                                  | <0.001 *** §                       |
| <b>α-Tocopherol (ng/mL)</b>  |                           |                                  |                           |                                  |                                    |
| At baseline (B)              | 1.43 (1.00)               |                                  | 1.88 (1.49)               |                                  | 0.275                              |
| At 12 months (12M)           | 1.30 (0.22)               | 0.221                            | 0.98 (0.42)               | <0.001 ***                       |                                    |
| At washout (WO)              | 0.86 ± 0.27 / 0.83 (0.25) | <0.001 ***                       | 0.93 ± 0.30 / 0.89 (0.44) | <0.001 ***                       | 0.285 §                            |
| WO – B                       | -0.55 (0.88)              |                                  | -0.84 (1.58)              |                                  | 0.559                              |
| WO – 12M                     | -0.49 (0.26)              |                                  | -0.08 (0.33)              |                                  | <0.001 ***                         |

\*  $p < 0.05$ , \*\*  $p < 0.01$ , \*\*\*  $p < 0.001$ 

Data presented as median (interquartile range) or mean ± standard deviation.

†  $p$ -value obtained from Wilcoxon signed rank test by comparing the median within each intervention group. ‡ $p$ -value obtained from Mann-Whitney U test by comparing the median between Tocovid and placebo groups. § $p$ -value obtained from independent t-test by comparing the mean between Tocovid and placebo groups.
